# Supplementary material for: Baseline risk factors associated with all-cause early hospitalization of older patients following admission to Danish municipal temporary stays
Source: Research Square preprint supplement (doi:10.21203/rs.3.rs-7740773/v1), 2025-10-23
Supplement: Supplementary file 1 [file b509a3d33e28a430d562dd03.docx]

**Supplementary material**

**Baseline risk factors associated with all-cause early hospitalization of older patients following admission to Danish municipal temporary stays**

Authors: Mahan Rajaeigolsefidi1, Anton Pottegård2,3, Kasper Edwards1, Kathrin Kirchner1

1Department of Engineering Technology and Didactics, Technical University of Denmark, Ballerup, Denmark

2Department of Public Health, University of Southern Denmark, Odense, Denmark

3Hospital Pharmacy Funen, Odense University Hospital, Odense, Denmark

Corresponding author: Mahan Rajaeigolsefidi, Email: mahraj@dtu.dk

**Content:**

**Additional Tables**

Table A1……………………………Page 2

Table A2, Table A3, Table A4……...Page 3

Table A5, Table A6…………………Page 4

**Table A1.** List of municipalities included in this study and the corresponding regions.

| **Region** | **Municipality** | **Patient count (%)** |
| --- | --- | --- |
| Capital Region of Denmark | Brøndby | 963 (8.53) |
| Gladsaxe | 1595 (14.14) |
| Glostrup | 623 (5.52) |
| Helsingør | 1383 (12.26) |
| Rødovre | 1081 (9.58) |
| Zealand | Holbæk | 344 (3.05) |
| Kalundborg | 728 (6.45) |
| Lolland | 982 (8.70) |
| Ringsted | 279 (2.47) |
| Region of Southern Denmark | Faaborg-Midtfyn | 441 (3.91) |
| Fredericia | 1051 (9.31) |
| Nordfyns | 636 (5.64) |
| Vejen | 383 (3.39) |
| Central Region of Denmark | Ringkøbing-Skjern | 795 (7.05) |
| *Total* | | *11284 (100)* |

**Table A2.** ICD-10 mapping of chronic conditions.

| **Morbidity** | **ICD-10** |
| --- | --- |
| Alcohol misuse | E52, F10, G621, I426, K292, K700, K703, K709, T51, Z502, Z714, Z721 |
| Asthma | J45 |
| Atrial fibrillation | I48 |
| Cancer, lymphoma | C81–C85, C88, C900, C902, C96 |
| Cancer, metastatic | C77-C79, C80 |
| Cancer, non-metastatic* | C18, C19, C20, C21, C33, C34, C384, C450, C4671, C50, C53, C61, D05, D06, D075 |
| Chronic heart failure | I099, I255, I420–I429, I43, I50 |
| Chronic kidney disease | N00–N09, N10–N19, N20–N23 |
| Chronic pain | F454, M081, M2550, M2551, M2555, M2557, M432–M436, M45, M461, M463, M464, M469, M508, M509, M51, M531–M533, M538, M539, M54, M608, M609, M633, M790–M792, M796, M997, M961 |
| Chronic pulmonary disease | I278, I279, J40–J44, J46, J47, J60–J67, J684, J701, J703 |
| Cirrhosis | B16, B180, B181 |
| Dementia | F00–F03, F051, G30, G311 |
| Depression | F204, F313–F315, F32, F33, F341, F412, F432 |
| Diabetes | E10–E14 |
| Epilepsy | G40, G41 |
| Hypertension | I10–I13, I15 |
| Hypothyroidism | E00–E03, E890 |
| Inflammatory bowel disease | K50, K51 |
| Multiple sclerosis | G35–G37, H46 |
| Myocardial infarction | I21, I22 |
| Parkinson’s disease | G20–G22 |
| Peptic ulcer disease | K257, K259, K267, K269, K277, K279, K287, K289 |
| Peripheral vascular disease | I170, I171, I1731, I1738, I1739, I771, I790, I792, K551, K558, K559, Z958, Z959 |
| Psoriasis | L400–L404, L408, L409 |
| Rheumatoid arthritis | M05, M06, M315, M32–M34, M351, M353, M360 |
| Schizophrenia | F20, F21, F232, F25 |
| Stroke or TIA | G450–G453, G458, G459, H341, I60, I61, I63, I64 |
| * breast, cervical, colorectal, lung, prostate | |

**Table A3.** SKS procedure codes excluded from surgeries.

| **SKS code starting with** | **Description** |
| --- | --- |
| KT | Minor surgical procedures |
| KU | Endoscopies |
| KW | Procedures performed in connection with surgery |
| KX | Unknown operations |

**Table A4.** ICD-10 mapping for fall injuries

| ICD-10 codes starting with |
| --- |
| S00 S01 S02 S06 S10 S12 S20 S21 S22 S30 S31 S32 S40 S41 S42 S50 S51 S52 S70 S71 S72 S80 S81 S82 S430 S431 S432 S530 S531 |

**Table A5.** Discriminant ability of 30-day hospitalization risk prediction models.

|  | Model variables | Scheike & Zhang method | |  | Fine–Gray method | |
| --- | --- | --- | --- | --- | --- | --- |
| c–index (95% CI) | Brier (95% CI) |  | c–index (95% CI) | Brier score (95% CI) |
| Full cohort (N = 11,284) | sex + age + multimorbidity | 56.86 (55.67–58.04) | 19.07 (18.69–19.46) |  | 56.69 (55.50–57.88) | 19.08 (18.69–19.47) |
| sex + age + multimorbidity + recent hospitalization | 57.62 (56.43–58.80) | 19.03 (18.64–19.41) |  | 57.44 (56.26–58.62) | 19.04 (18.66–19.43) |
| sex + age + multimorbidity + recent hospitalization + significant morbidities | 60.03 (58.85–61.21) | 18.82 (18.43–19.21) |  | 58.27 (57.08–59.46) | 18.95 (18.56–19.34) |
| sex + age + multimorbidity + recent hospitalization + significant morbidities + healthcare utilization markers | 62.25 (61.08–63.42) | 18.61 (18.22–18.99) |  | 60.29 (59.11–61.47) | 18.80 (18.42–19.19) |
| Recently hospitalized cohort (N = 8,740) | sex + age + multimorbidity | 56.73 (55.40–58.06) | 19.66 (19.24–20.08) |  | 56.44 (55.11–57.76) | 19.67 (19.25–20.10) |
| sex + age + multimorbidity + significant morbidities | 58.88 (57.55–60.22) | 19.49 (19.06–19.92) |  | 57.04 (55.70–58.38) | 19.60 (19.18–20.03) |
| sex + age + multimorbidity + significant morbidities + healthcare utility markers | 61.04 (59.71–62.36) | 19.30 (18.88–19.73) |  | 58.87 (57.53–60.21) | 19.47 (19.05–19.90) |
| sex + age + multimorbidity + significant morbidities + healthcare utilization markers + indicators of the recent hospitalization episode | 61.22 (59.90–62.54) | 19.25 (18.82–19.68) |  | 59.19 (57.86–60.52) | 19.44 (19.02–19.87) |
| Note 1: all c–index and Brier score values are multiplied by 100.  Note 2: significant morbidities = Atrial fibrillation + cancer, lymphoma + cancer, metastatic + cancer, nonmetastatic + chronic heart failure + chronic kidney disease + chronic pulmonary disease + cirrhosis + dementia + diabetes + stroke/TIA.  Note 3: healthcare utility markers = one–year history of hospitalization burden + polypharmacy + frequency of surgery.  Note 4: indicators of the recent hospitalization episode = primary diagnosis of fall injury + surgery + length of stay. | | | | | | |

**Table A6.** Difference in discriminant performance of Scheike & Zhang additive risk regression method and Fine-Gray method in predicting 30-day hospitalization risks.

|  | Model variables | Difference in discriminant performance (Scheike & Zhang vs Fine–Gray) | | |
| --- | --- | --- | --- | --- |
| ∆c–index (95% CI); p–value |  | ∆Brier–score (95% CI); p–value |
| Full cohort (N = 11,284) | sex + age + multimorbidity | 0.16 (-0.10 – 0.43); p = 00.23 |  | -0.01 (-0.03 – 0.02); p = 0.49 |
| sex + age + multimorbidity + recent hospitalization | 0.18 (-0.12 – 0.47); p = 0.24 |  | -0.02 (-0.04 – 0.01); p = 0.27 |
| sex + age + multimorbidity + recent hospitalization + significant morbidities | 1.760 (0.99 – 2.53); p < 0.0001 |  | -0.13 (-0.20 – -0.06); p < 0.001 |
| sex + age + multimorbidity + recent hospitalization + significant morbidities + healthcare utilization markers | 1.96 (1.24 – 2.68); p < 0.0001 |  | -0.19 (-0.27 – -0.11); p < 0.0001 |
| Recently hospitalized cohort (N = 8,740) | sex + age + multimorbidity | 0.30 (-0.16 – 0.75); p = 0.21 |  | -0.01 (-0.04 – 0.02); p = 0.45 |
| sex + age + multimorbidity + significant morbidities | 1.84 (0.92 – 2.76); p < 0.0001 |  | -0.11 (-0.19 – -0.04); p < 0.01 |
| sex + age + multimorbidity + significant morbidities + healthcare utility markers | 2.17 (1.27 – 3.07); p < 0.0001 |  | -0.17 (-0.26 – -0.08); p < 0.001 |
| sex + age + multimorbidity + significant morbidities + healthcare utilization markers + indicators of the recent hospitalization episode | 2.03 (1.10 – 2.97); p < 0.0001 |  | -0.19 (-0.29 – -0.09); p < 0.001 |
| Note: all ∆c–index and ∆Brier–score values are multiplied by 100. | | | | |
